# Supplementary material
Source: PubMed Central journal article supplement (PMC2733042)
Supplement: kwp115_1.pdf [file kwp115_1.pdf]

**Web Table 1.** Factors included in Observational Study (OS) hazard ratio analyses to control confounding. Corresponding coefficients are estimated separately for subsets of women with or without prior postmenopausal hormone therapy (HT)

| Variables                                                    | CHD, stroke, VT,<br>total mortality,<br>deaths from<br>other causes | breast<br>cancer | hip<br>fracture | colorectal<br>cancer | endometrial<br>cancer | total<br>invasive<br>cancer | global index |
|--------------------------------------------------------------|---------------------------------------------------------------------|------------------|-----------------|----------------------|-----------------------|-----------------------------|--------------|
| age (linear)                                                 | x                                                                   | x                | x               | x                    | x                     | x                           | x            |
| non-white ethnicity (yes vs. no)                             | x                                                                   | x                | x               | x                    | x                     | x                           | x            |
| BMI* 25-29.9                                                 | x                                                                   | x                | x               | x                    | x                     | x                           | x            |
| BMI 30-34.9                                                  | x                                                                   | x                | x               | x                    | x                     | x                           | x            |
| BMI >= 35                                                    | x                                                                   | x                | x               | x                    | x                     | x                           | x            |
| BMI (linear)                                                 | x                                                                   | x                | x               | x                    | x                     | x                           | x            |
| school after HS (yes vs. no)                                 | x                                                                   | x                |                 |                      |                       | x                           | x            |
| college degree or higher (yes vs. no)                        | x                                                                   | x                |                 |                      |                       | x                           | x            |
| past smoker (yes vs. no)                                     | x                                                                   | x                | x               | x                    | x                     | x                           | x            |
| current smoker (yes vs. no)                                  | x                                                                   | x                | x               | x                    | x                     | x                           | x            |
| physical functioning construct                               | x                                                                   |                  |                 |                      |                       |                             |              |
| past (alcohol) drinker (yes vs. no)                          |                                                                     | x                |                 | x                    |                       | x                           | x            |
| current drinker, <1dr/wk                                     |                                                                     | x                |                 | x                    |                       | x                           | x            |
| current drinker, 1-7 dr/wk                                   |                                                                     | x                |                 | x                    |                       | x                           | x            |
| current drinker, > 7 dr/wk                                   |                                                                     | x                |                 | x                    |                       | x                           | x            |
| self reported general health (good/vgood/excl vs fair/poor)  |                                                                     | x                |                 |                      |                       |                             |              |
| total expenditure from physical activity (quartiles vs none) |                                                                     | x                |                 |                      |                       |                             |              |
| family history of breast cancer (yes vs. no)                 |                                                                     | x                |                 |                      |                       |                             |              |
| bilateral oophorectomy (yes vs. no)                          |                                                                     | x                |                 | x                    |                       | x                           | x            |
| Gail 5yr breast cancer risk score (linear)                   |                                                                     | x                |                 |                      |                       |                             |              |
| Gail 5yr breast cancer risk score 1.25- <1.75                |                                                                     | x                |                 |                      |                       |                             |              |
| Gail 5yr breast cancer risk score >=1.75                     |                                                                     | x                |                 |                      |                       |                             |              |
| Duration of prior E+P use < 5yr <sup>†</sup>                 | x                                                                   | x                | x               | x                    | x                     | x                           | x            |
| Duration of prior E+P use 5-10yr <sup>†</sup>                | x                                                                   | x                | x               | x                    | x                     | x                           | x            |
| Duration of prior E+P use >10yr <sup>†</sup>                 | x                                                                   | x                | x               | x                    | x                     | x                           | x            |
| Duration of prior E-alone use < 5yr <sup>†</sup>             | x                                                                   | x                | x               | x                    | x                     | x                           | x            |
| Duration of prior E-alone use 5-10yr <sup>†</sup>            | x                                                                   | x                | x               | x                    | x                     | x                           | x            |
| Duration of prior E-alone use >10yr <sup>†</sup>             | x                                                                   | x                | x               | x                    | x                     | x                           | x            |
| number of falls                                              |                                                                     |                  | x               |                      |                       |                             |              |
| total calcium intake, grams/day                              |                                                                     |                  | x               |                      |                       |                             |              |
| family history of fracture (yes vs. no)                      |                                                                     |                  | x               |                      |                       |                             |              |
| personal history of fracture (yes vs. no)                    |                                                                     |                  | x               |                      |                       |                             |              |
| family history of colorectal cancer (yes vs. no)             |                                                                     |                  |                 | x                    |                       |                             |              |
| waist circumference (tertiles or 88cm cutoff)                |                                                                     |                  |                 | x                    |                       |                             |              |
| height (tertiles)                                            |                                                                     |                  |                 | x                    |                       |                             |              |
| history of polyp removal (yes vs. no)                        |                                                                     |                  |                 | x                    |                       |                             |              |
| dietary selenium intake                                      |                                                                     |                  |                 | x                    |                       |                             |              |
| history of treated diabetes (yes vs. no)                     | x                                                                   |                  |                 | x                    | x                     |                             | x            |
| NSAID* use (yes vs. no)                                      |                                                                     |                  |                 | x                    |                       |                             |              |
| Prior OC* use (yes vs. no)                                   |                                                                     |                  |                 | x                    |                       |                             |              |
| history of hypertension (yes vs. no)                         | x                                                                   |                  |                 |                      | x                     |                             | x            |
| family history of any cancer (yes vs. no)                    |                                                                     |                  |                 |                      |                       | x                           |              |
| personal history of non-melanoma skin cancer (yes vs. no)    |                                                                     |                  |                 |                      |                       | x                           |              |
| history of high cholesterol requiring medication             | x                                                                   |                  |                 |                      |                       |                             | x            |

\* BMI, body mass index; NSAID, non-steroidal anti-inflammatory drug; OC, oral contraceptive.

<sup>†</sup> These factors included only for women with prior hormone therapy.

**Web Table 2.** Numbers of clinical outcomes among HT user groups contributing to Table 4 analyses in the OS, after excluding women having missing confounding factors as listed for each outcome in Appendix 1, and numbers of clinical outcomes among HT user groups contributing to Table 5 analyses in both the CT and OS, after additional non-adherence censoring of follow-up times.

| Prior HT*                                 | CEE Users |        |      |     |        |      | CEE/MPA Users |        |      |     |        |      |
|-------------------------------------------|-----------|--------|------|-----|--------|------|---------------|--------|------|-----|--------|------|
|                                           | No        |        |      | Yes |        |      | No            |        |      | Yes |        |      |
| Gap time (yrs)                            | < 5       | 5 - 15 | > 15 | < 5 | 5 - 15 | > 15 | < 5           | 5 - 15 | > 15 | < 5 | 5 - 15 | > 15 |
| <b>OS Cases Among HT Users in Table 4</b> |           |        |      |     |        |      |               |        |      |     |        |      |
| Number of cases:                          |           |        |      |     |        |      |               |        |      |     |        |      |
| CHD                                       | 97        | 28     | 14   | 29  | 4      | 1    | 29            | 11     | 7    | 8   | 2      | 0    |
| Stroke                                    | 111       | 37     | 13   | 39  | 7      | 3    | 24            | 7      | 3    | 7   | 0      | 0    |
| VT                                        | 51        | 28     | 10   | 15  | 3      | 0    | 38            | 13     | 7    | 3   | 3      | 0    |
| Invasive breast cancer                    | 164       | 31     | 10   | 41  | 5      | 0    | 146           | 31     | 5    | 36  | 3      | 0    |
| Invasive colorectal cancer                | 27        | 5      | 3    | 18  | 0      | 0    | 19            | 4      | 2    | 2   | 1      | 1    |
| Invasive endometrial cancer               | -         | -      | -    | -   | -      | -    | 25            | 3      | 2    | 6   | 0      | 0    |
| Hip fracture                              | 35        | 9      | 4    | 14  | 2      | 0    | 9             | 7      | 5    | 6   | 1      | 1    |
| Death from other causes                   | 180       | 40     | 28   | 49  | 11     | 1    | 48            | 20     | 13   | 11  | 3      | 0    |
| Global index                              | 611       | 145    | 68   | 185 | 26     | 4    | 317           | 82     | 36   | 78  | 13     | 2    |
| Total invasive cancer                     | 382       | 86     | 29   | 111 | 12     | 1    | 264           | 62     | 17   | 62  | 6      | 1    |
| Total mortality                           | 249       | 63     | 35   | 65  | 13     | 3    | 69            | 22     | 16   | 14  | 4      | 0    |
| <b>CT Cases Among HT Users in Table 5</b> |           |        |      |     |        |      |               |        |      |     |        |      |
| Number of cases:                          |           |        |      |     |        |      |               |        |      |     |        |      |
| CHD                                       | 1         | 10     | 25   | 38  | 6      | 2    | 8             | 27     | 51   | 26  | 1      | 1    |
| Stroke                                    | 2         | 14     | 25   | 39  | 1      | 2    | 4             | 19     | 34   | 15  | 2      | 2    |
| VT                                        | 1         | 4      | 15   | 34  | 2      | 1    | 6             | 37     | 43   | 23  | 2      | 0    |
| Invasive breast cancer                    | 2         | 3      | 14   | 26  | 3      | 1    | 16            | 36     | 20   | 34  | 5      | 1    |
| Invasive colorectal cancer                | 0         | 5      | 10   | 15  | 0      | 0    | 1             | 6      | 12   | 4   | 2      | 0    |
| Invasive endometrial cancer               | -         | -      | -    | -   | -      | -    | 1             | 2      | 2    | 3   | 0      | 2    |
| Hip fracture                              | 1         | 1      | 2    | 3   | 1      | 0    | 0             | 5      | 14   | 2   | 1      | 0    |
| Death from other causes                   | 0         | 5      | 12   | 34  | 1      | 2    | 4             | 10     | 23   | 9   | 1      | 0    |
| Global index                              | 5         | 38     | 92   | 165 | 13     | 8    | 38            | 127    | 167  | 98  | 14     | 5    |
| Total invasive cancer                     | 7         | 17     | 47   | 92  | 5      | 2    | 24            | 83     | 74   | 70  | 12     | 3    |
| Total mortality                           | 2         | 10     | 23   | 58  | 3      | 3    | 4             | 15     | 44   | 18  | 1      | 0    |
| <b>OS Cases Among HT Users in Table 5</b> |           |        |      |     |        |      |               |        |      |     |        |      |
| Number of cases:                          |           |        |      |     |        |      |               |        |      |     |        |      |
| CHD                                       | 95        | 26     | 11   | 27  | 4      | 1    | 24            | 11     | 7    | 7   | 2      | 0    |
| Stroke                                    | 105       | 35     | 13   | 33  | 7      | 3    | 22            | 6      | 2    | 7   | 0      | 0    |
| VT                                        | 46        | 26     | 8    | 15  | 2      | 0    | 31            | 11     | 7    | 2   | 3      | 0    |
| Invasive breast cancer                    | 158       | 31     | 8    | 39  | 5      | 0    | 137           | 29     | 5    | 31  | 2      | 0    |
| Invasive colorectal cancer                | 25        | 4      | 2    | 14  | 0      | 0    | 15            | 2      | 2    | 2   | 1      | 1    |
| Invasive endometrial cancer               | -         | -      | -    | -   | -      | -    | 23            | 3      | 1    | 4   | 0      | 0    |
| Hip fracture                              | 29        | 9      | 4    | 10  | 2      | 0    | 9             | 5      | 5    | 5   | 1      | 1    |
| Death from other causes                   | 162       | 36     | 23   | 44  | 11     | 1    | 42            | 17     | 10   | 10  | 2      | 0    |
| Global index                              | 574       | 136    | 54   | 165 | 26     | 4    | 292           | 70     | 31   | 67  | 11     | 2    |
| Total invasive cancer                     | 361       | 76     | 25   | 97  | 12     | 1    | 240           | 52     | 15   | 55  | 4      | 1    |
| Total mortality                           | 225       | 57     | 28   | 57  | 13     | 3    | 57            | 19     | 13   | 13  | 3      | 0    |
